# Supplementary material for: Effects of aluminum incorporation on the schwertmannite structure and surface properties
Source: Royal Society of Chemistry journal article supplement (doi:10.1039/d2em00029f), 2022-01-01

## Supporting Information

### Effects of Aluminum Incorporation on Schwertmannite Structure and Surface Properties

Sergio Carrero <sup>a,\*</sup>, Alejandro Fernandez-Martinez <sup>b</sup>, Rafael Pérez-López <sup>c</sup>, Jordi Cama <sup>a</sup>,  
Catherine Dejoie <sup>d</sup>, José Miguel Nieto <sup>c</sup>

<sup>a</sup> Institute of Environmental Assessment and Water Research (IDÆA-CSIC), 08034,  
Barcelona, Spain

<sup>b</sup> Université Grenoble Alpes, Université Savoie Mont Blanc, CNRS, IRD, IFSTTAR, ISTERRE,  
38000 Grenoble, France

<sup>c</sup> Department of Earth Sciences & Research Center on Natural Resources, Health and the  
Environment, University of Huelva, Campus 'El Carmen', 21071, Huelva, Spain

<sup>d</sup> European Synchrotron Radiation Facility, 71 avenue des Martyrs, Grenoble, 3800, France

---

\*Corresponding author. Tel.: +34 934 006 100 Ext: 437695

E-mail address: sergio.carrero@idaea.csic.es (S. Carrero)

**Table S1.** Weight percent of stoichiometric water and weight loss (%) from TGA data.

| Sample                 | % w w (OH <sup>-</sup> + H <sub>2</sub> O) | % w lost TGA |
|------------------------|--------------------------------------------|--------------|
| Al-Sch <sub>0.00</sub> | 24.41                                      | 25.02        |
| Al-Sch <sub>0.03</sub> | 21.94                                      | 24.51        |
| Al-Sch <sub>0.08</sub> | 20.80                                      | 24.67        |
| Al-Sch <sub>0.32</sub> | 27.22                                      | 24.79        |



**Table S3.** Calculated saturation index (SI) for supersaturated Fe(III)-As(V)-Al- mineral phases of reacted solution using the PHREEQC code (Mintq.v4 database). The model was run at 25 °C, pH 3.5 and with ion strength of 100 mmol L<sup>-1</sup>. Bold values represent the supersaturated phases for each adsorption experiment.

| Phases        | Formula                                            | SI          | Phases         | Formula                                                                                | SI          |
|---------------|----------------------------------------------------|-------------|----------------|----------------------------------------------------------------------------------------|-------------|
| Al(OH)3(am)   | Al(OH) <sub>3</sub> (am)                           | -5.10       | Gibbsite       | Al(OH) <sub>3</sub>                                                                    | -2.59       |
| Al2O3         | Al <sub>2</sub> O <sub>3</sub>                     | -8.25       | Goethite       | FeOOH                                                                                  | <b>3.37</b> |
| Basaluminite  | Al <sub>4</sub> (OH) <sub>10</sub> SO <sub>4</sub> | -11.64      | H-Jarosite     | (H <sub>3</sub> O)Fe <sub>3</sub> (SO <sub>4</sub> ) <sub>2</sub> (OH) <sub>6</sub>    | <b>2.78</b> |
| AlAsO4·2H2O   | AlAsO <sub>4</sub> ·2H <sub>2</sub> O              | -2.73       | Halite         | NaCl                                                                                   | -4.28       |
| AlOHSO4       | AlOHSO <sub>4</sub>                                | -1.52       | Hematite       | Fe <sub>2</sub> O <sub>3</sub>                                                         | <b>9.14</b> |
| As2O5         | As <sub>2</sub> O <sub>5</sub>                     | -13.97      | Lepidocrocite  | FeOOH                                                                                  | <b>2.49</b> |
| Boehmite      | AlOOH                                              | -2.88       | Maghemite      | Fe <sub>2</sub> O <sub>3</sub>                                                         | <b>1.34</b> |
| Diaspore      | AlOOH                                              | -1.17       | Mirabilite     | Na <sub>2</sub> SO <sub>4</sub> ·10H <sub>2</sub> O                                    | -5.03       |
| Fe(OH)2.7Cl.3 | Fe(OH) <sub>2.7</sub> Cl <sub>0.3</sub>            | <b>5.45</b> | Na-Jarosite    | NaFe <sub>3</sub> (SO <sub>4</sub> ) <sub>2</sub> (OH) <sub>6</sub>                    | <b>4.04</b> |
| Fe2(SO4)3     | Fe <sub>2</sub> (SO <sub>4</sub> ) <sub>3</sub>    | -19.90      | Schwertmannite | Fe <sub>8</sub> O <sub>8</sub> (OH) <sub>4.32</sub> (SO <sub>4</sub> ) <sub>1.84</sub> | <b>3.66</b> |
| FeAsO4·2H2O   | FeAsO <sub>4</sub> ·2H <sub>2</sub> O              | -0.17       | Thenardite     | Na <sub>2</sub> SO <sub>4</sub>                                                        | -6.45       |
| Ferrihydrite  | Fe(OH) <sub>3</sub>                                | <b>0.67</b> |                |                                                                                        |             |

**Table S4.** Fitted parameters of As(V) adsorption in schwertmannite (Sch) by Langmuir models and exchange isotherm between sulfate ( $\text{SO}_4^{2-}$ ) and arsenate ( $\text{H}_2\text{AsO}_4^-$ ).

| Model                  | Langmuir Adsorption Isotherm |           |       |                                                                                |           | $\text{SO}_4^{2-}$ - $\text{H}_2\text{AsO}_4^-$ Exchange Parameter |           |       |            |
|------------------------|------------------------------|-----------|-------|--------------------------------------------------------------------------------|-----------|--------------------------------------------------------------------|-----------|-------|------------|
|                        | Slope                        | Intercept | $R^2$ | $\Gamma_{\text{max}}$ ( $\text{mol}_{\text{As}} \text{mol}_{\text{Fe}}^{-2}$ ) | Log $K_L$ | Slope                                                              | Intercept | $R^2$ | % Exchange |
| Al-Sch <sub>0.00</sub> | 5.1272                       | 0.000010  | 0.999 | 0.195                                                                          | 5.71      | 0.5333                                                             | 42.239    | 0.986 | 59         |
| Al-Sch <sub>0.03</sub> | 4.2978                       | 0.000100  | 0.995 | 0.233                                                                          | 4.63      | 0.5695                                                             | 51.500    | 0.992 | 72         |
| Al-Sch <sub>0.08</sub> | 4.5233                       | 0.000002  | 0.999 | 0.221                                                                          | 6.35      | 0.5445                                                             | 46.906    | 0.988 | 68         |
| Al-Sch <sub>0.32</sub> | 3.8502                       | 0.000020  | 0.999 | 0.260                                                                          | 5.28      | 0.4899                                                             | 42.200    | 0.979 | 75         |

**Figure S1.** Thermogravimetric analysis results from Al-Sch samples. The weight lost during the measurement is normalized to the initial sample weight. The dashed horizontal line indicates the average weight lost for all the solid samples.

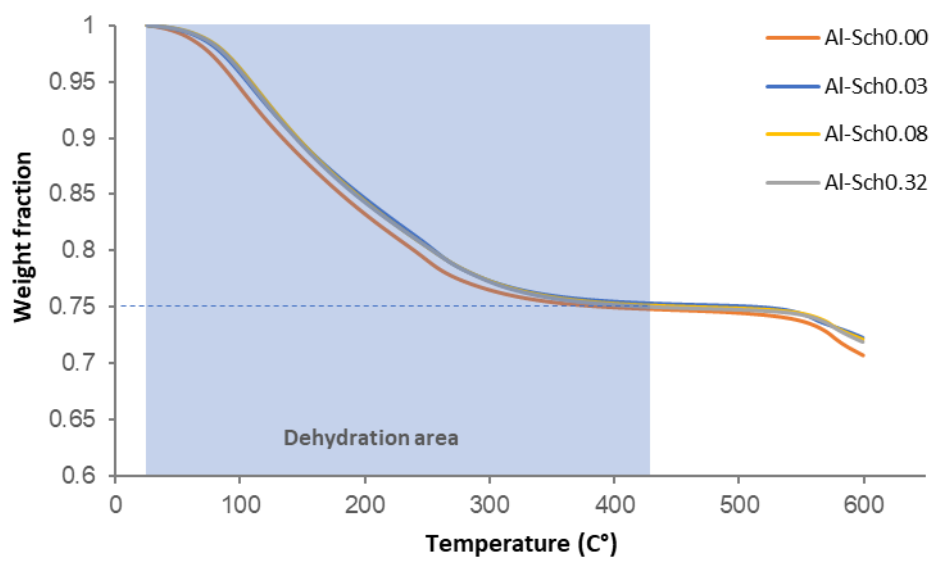

**Figure S2:** Correlation between  $\text{Al}^{+3}$  contained in Al-Sch ( $\text{mmol g}^{-1}_{\text{sch}}$ ) with (a) sulfate and (b)  $\text{OH}^-$  ( $\text{mmol g}^{-1}_{\text{sch}}$ ). The solids selected for As(V) adsorption experiments are indicated with black arrows.

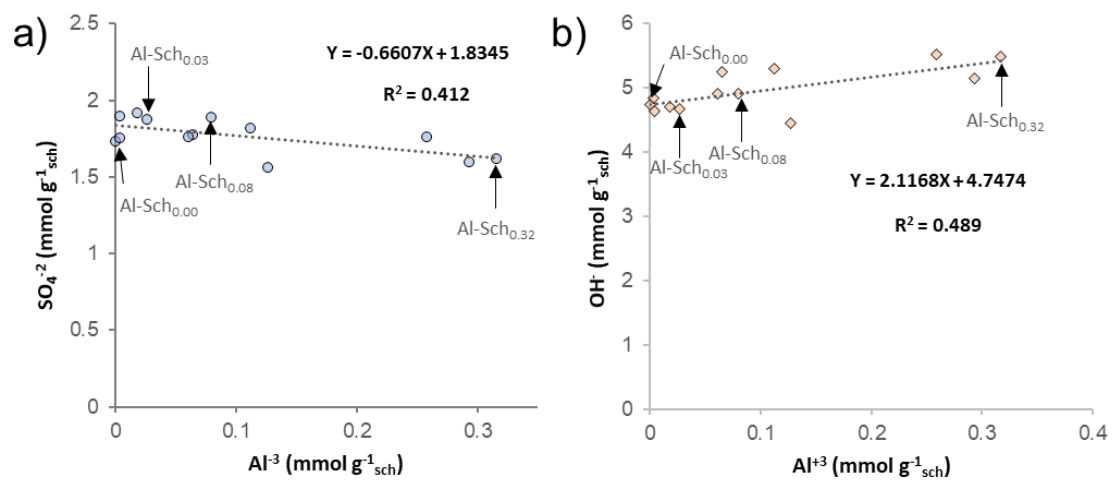

**Figure S3:** Ion exchange isotherm: exchange between As(V) with sulfate onto (a) Al-Sch<sub>0.00</sub> (b) Al-Sch<sub>0.03</sub> (c) Al-Sch<sub>0.08</sub> (d) Al-Sch<sub>0.32</sub>. The experiment was conducted with an ionic strength of 100 mmol L<sup>-1</sup>, 6·10<sup>-2</sup> to 10 mmol L<sup>-1</sup> oxyanion concentration and 2.5 g L<sup>-1</sup> of solid phase.

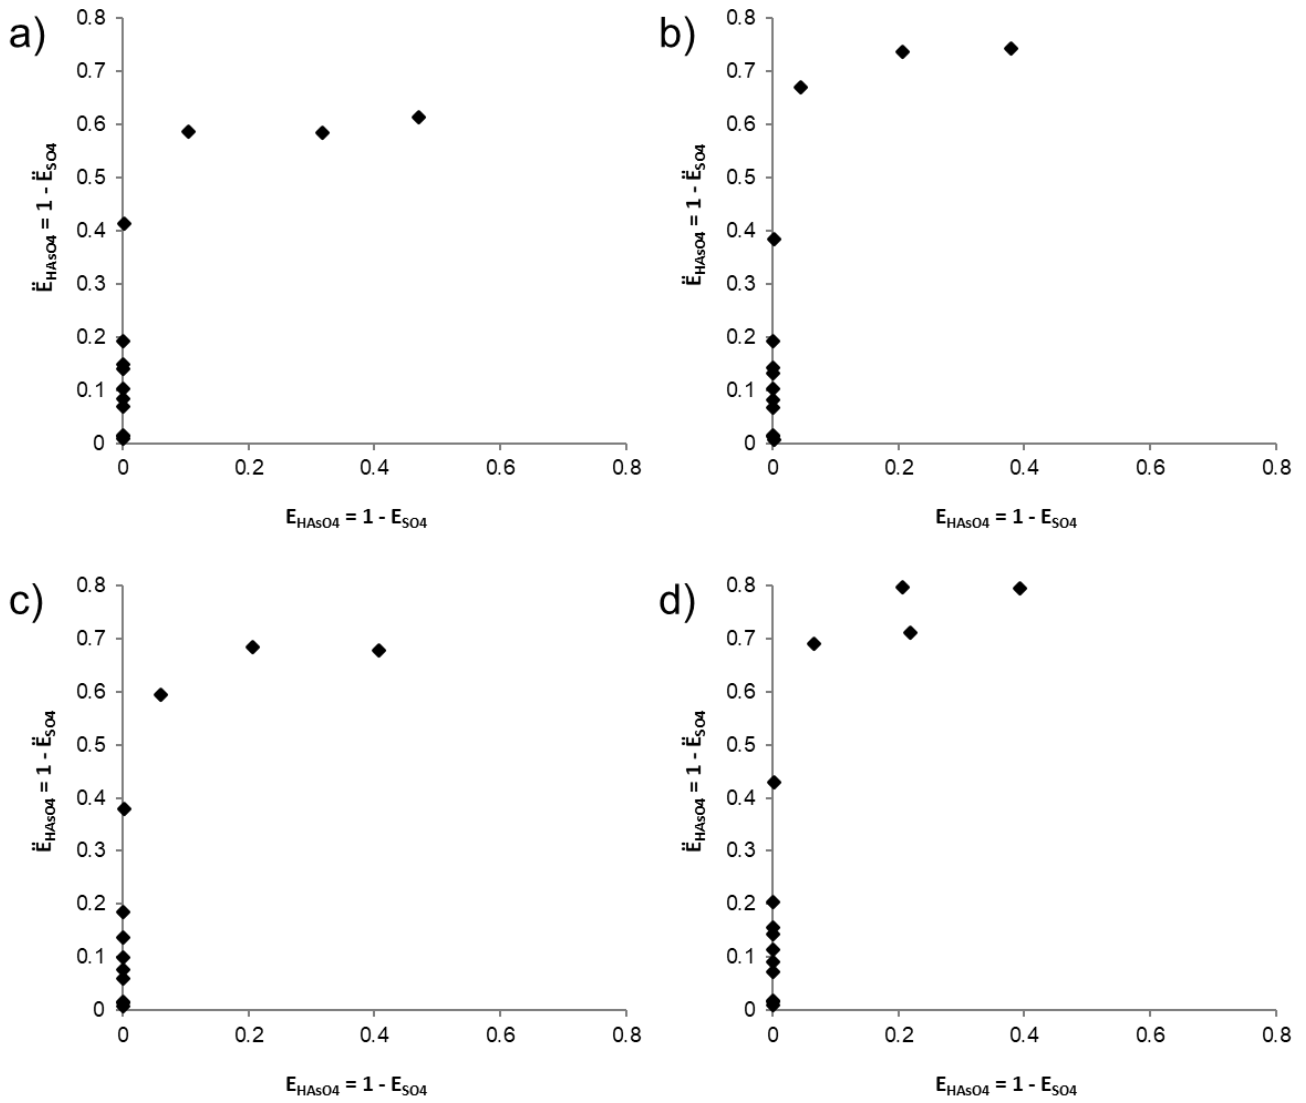



**Figure S4:** d-PDFs of arsenate onto (a) Al-Sch<sub>0.00</sub> (b) Al-Sch<sub>0.03</sub> (c) Al-Sch<sub>0.08</sub> (d) Al-Sch<sub>0.32</sub> with 1.5, 3.0, 5.0, 7.0 mmol L<sup>-1</sup> of arsenate.

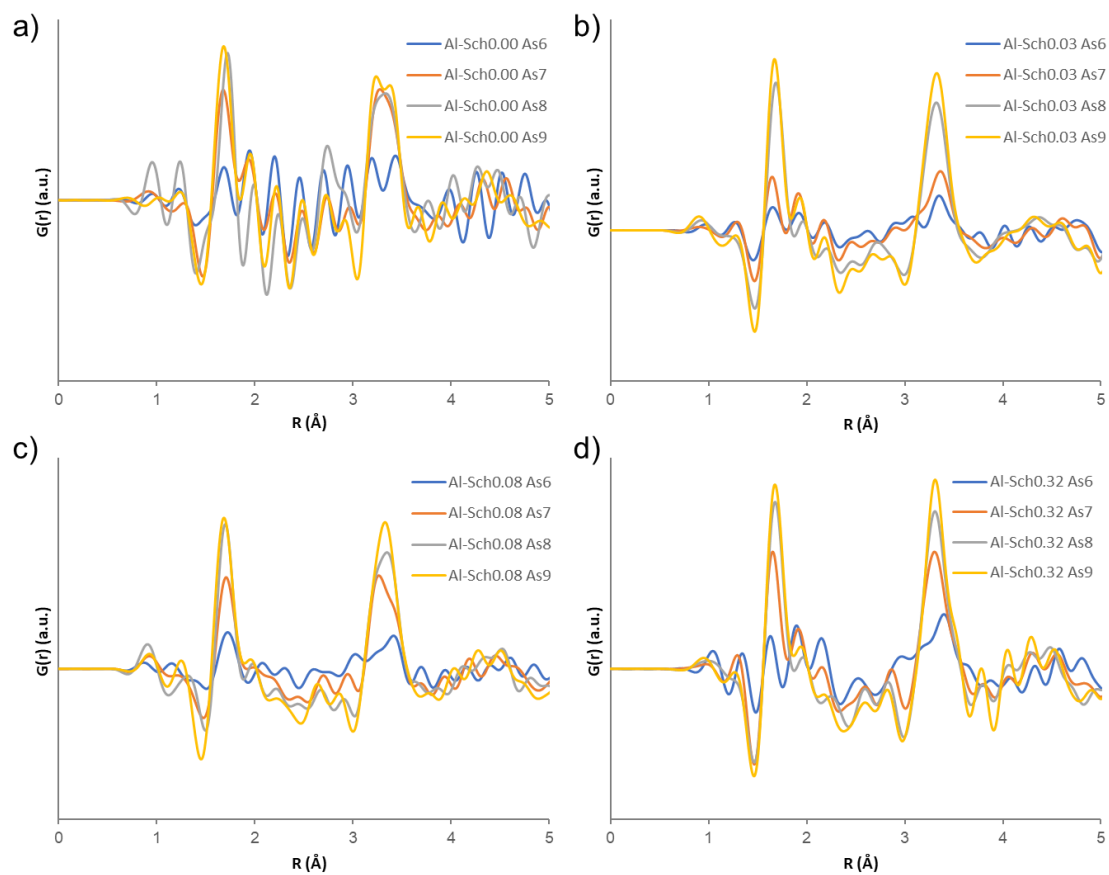

**Figure S5:** d-PDFs of arsenate onto Al-Sch<sub>0.32</sub> with 1.5, 3.0, 5.0, 7.0 mmol L<sup>-1</sup> of arsenate. Zoom in the Fe-Fe and Fe-O peaks where Al incorporation affect the intensity of these atoms' pairs.

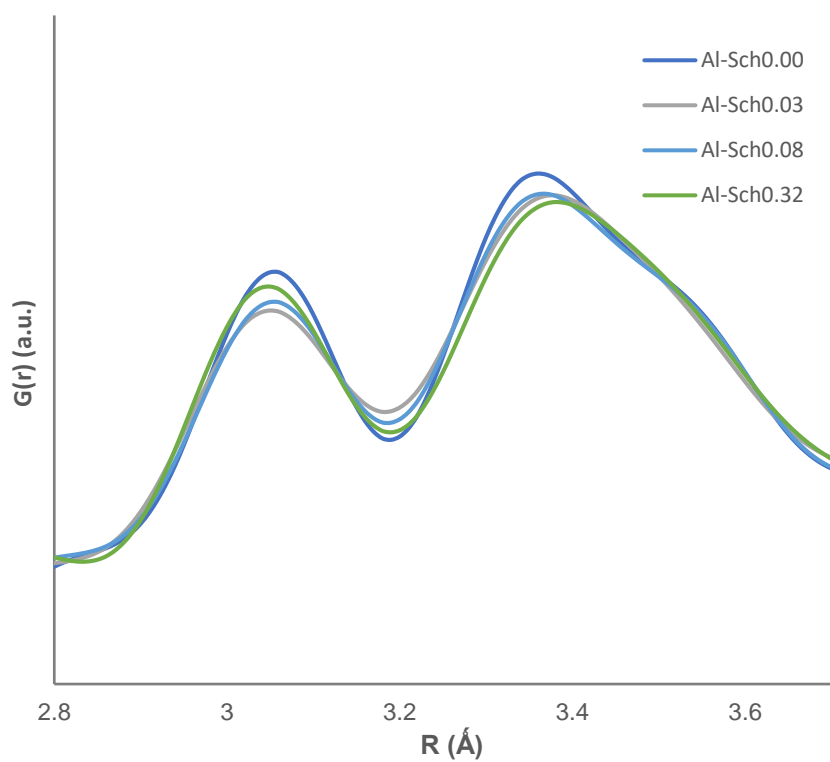

Supplement: d2em00029f1.pdf [file d2em00029f1.pdf]
